# Supplementary material for: Repression of YAP by NCTD disrupts NSCLC progression
Source: PubMed Central journal article supplement (PMC5356801; doi:10.18632/oncotarget.13668), 2016-11-26
Supplement: oncotarget-08-2307-s001.pdf [file oncotarget-08-2307-s001.pdf]

## Repression of YAP by NCTD disrupts NSCLC progression

### Supplementary Materials

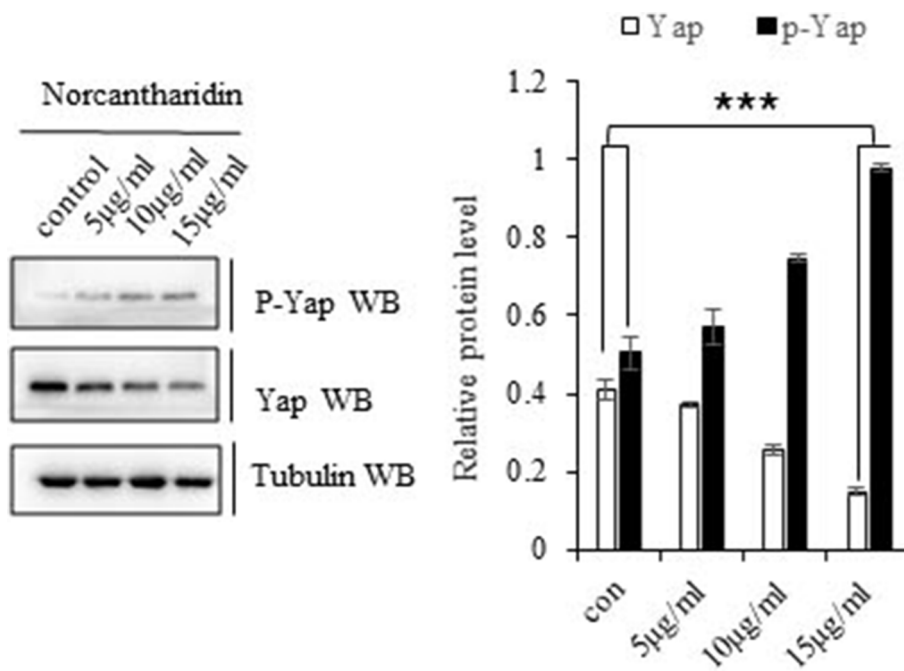

Supplementary Figure S1: NCTD dose-dependently reduced Yap protein level, but increased phosphorylated YAP in the H1299 cells.

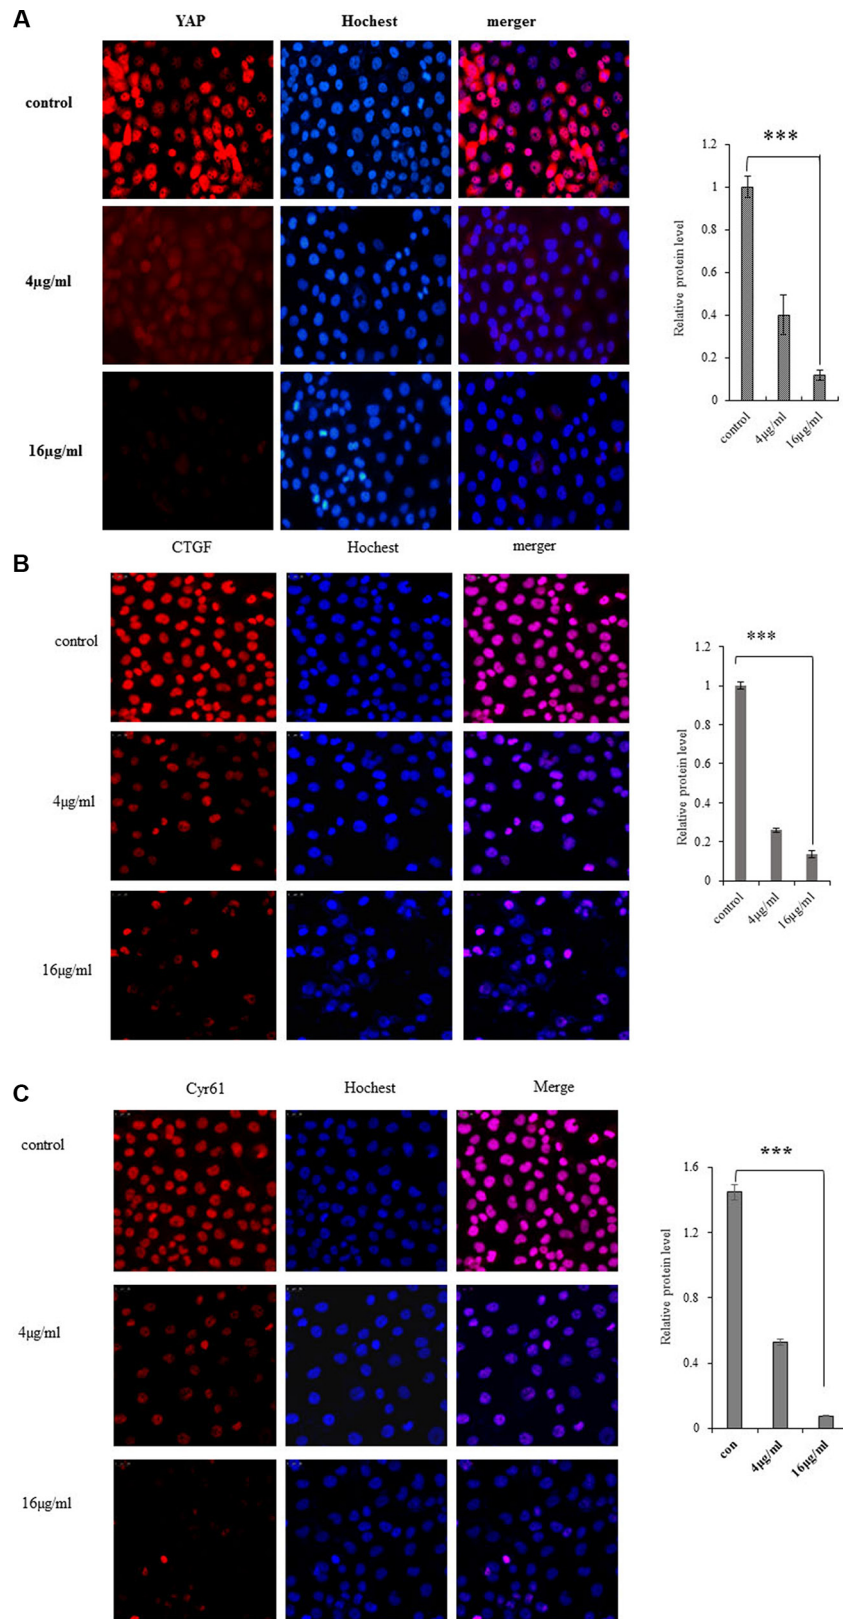

**Supplementary Figure S2: NCTD represses YAP and its downstream targets.** (A–C) Representative immunofluorescent staining of Yap (A), CTGF (B) and CYR61 (C) proteins with semi-quantitation showing that NCTD at 4 μM and 16 μM for 72 hours significantly decreased both CTGF (B) and CYR61 (C) protein level in A549 cells. \*\*\* $P < 0.0001$  by Student's  $t$ -test.
